# Supplementary material
Source: Springer Nature journal article supplement (https://www.springermedizin.de/resource/supplementary/13601_2011_5_MOESM17_ESM.pdf/9677268)
Supplement: MOESM17 [file 9677268]

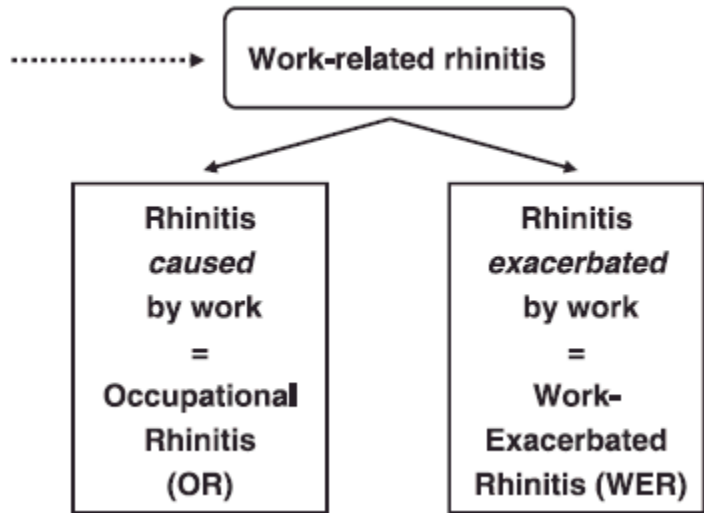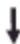

- **Allergic OR (with latency period):**
  - IgE-mediated
  - Non-IgE-mediated
- **Non-allergic OR (without latency):**
  - Single exposure: RUDS
  - Multiple exposures: Irritant-induced OR
  - Corrosive rhinitis
